# Supplementary material for: Strain-tunable magnetic anisotropy in two-dimensional Dirac half-metals: nickel trihalides
Source: Royal Society of Chemistry journal article supplement (doi:10.1039/c9ra06474e), 2019-01-01
Supplement: c9ra06474e1.pdf [file c9ra06474e1.pdf]

## Supplementary Information

### **Strain-tunable magnetic anisotropy in two-dimensional Dirac half- metals: Nickel Trihalides**

Zheng Li<sup>1</sup>, Baozeng Zhou<sup>1,\*</sup>, Chongbiao Luan<sup>2</sup>

*<sup>1</sup>Tianjin Key Laboratory of Film Electronic & Communicate Devices, School of Electrical and  
Electronic Engineering, Tianjin University of Technology, Tianjin 300384, China*

*<sup>2</sup>Institute of Fluid Physics, China Academy of Engineering Physics, Mianyang, Sichuan 621999,  
China*

---

\* Author to whom all correspondence should be addressed.

E-mail: [baozeng@tju.edu.cn](mailto:baozeng@tju.edu.cn)

**Table S1.** Calculated lattice constants, Ni-X bond length  $l$ , Ni-X-Ni bond angle  $\theta_1$ , X-Ni-X axial angle  $\theta_2$ , cohesive energy  $E_{\text{coh}}$ , and 2D Young's modulus for the FM phase of the nickel trihalides. The energy difference between FM and various AFM states ( $E_{\text{FM}}-E_{\text{AFM}}$ ) of the  $2\times 2\times 1$  supercell, magnetic moment of Ni ion, and MAE.

|                   | Structural parameters          |                            |                            |                           |                                        |                                      |
|-------------------|--------------------------------|----------------------------|----------------------------|---------------------------|----------------------------------------|--------------------------------------|
|                   | $a$ (Å)                        | $l$ (Å)                    | $\theta_1$ (deg)           | $\theta_2$ (deg)          | $E_{\text{coh}}$ (eV/atom)             | $Y_{2\text{D}}$ (N m <sup>-1</sup> ) |
| NiCl <sub>3</sub> | 5.940                          | 2.296                      | 96.6                       | 171.9                     | -3.03                                  | 20.45                                |
| NiBr <sub>3</sub> | 6.313                          | 2.452                      | 96.0                       | 171.6                     | -2.54                                  | 16.46                                |
| NiI <sub>3</sub>  | 6.815                          | 2.652                      | 95.8                       | 171.2                     | -1.98                                  | 10.41                                |
|                   | Magnetic parameters            |                            |                            |                           |                                        |                                      |
|                   | $\Delta E_{\text{Néel}}$ (meV) | $\Delta E_{\text{zigzag}}$ | $\Delta E_{\text{stripy}}$ | $\Delta E_{\text{mixed}}$ | $Mag_{\text{Ni}}$ ( $\mu_{\text{B}}$ ) | MAE ( $\mu\text{eV}/\text{Ni}$ )     |
| NiCl <sub>3</sub> | -537                           | -129                       | -327                       | -340                      | 1.15                                   | 217.5                                |
| NiBr <sub>3</sub> | -569                           | -155                       | -359                       | -368                      | 1.18                                   | 263.5                                |
| NiI <sub>3</sub>  | -624                           | -178                       | -382                       | -391                      | 1.23                                   | -320.6                               |

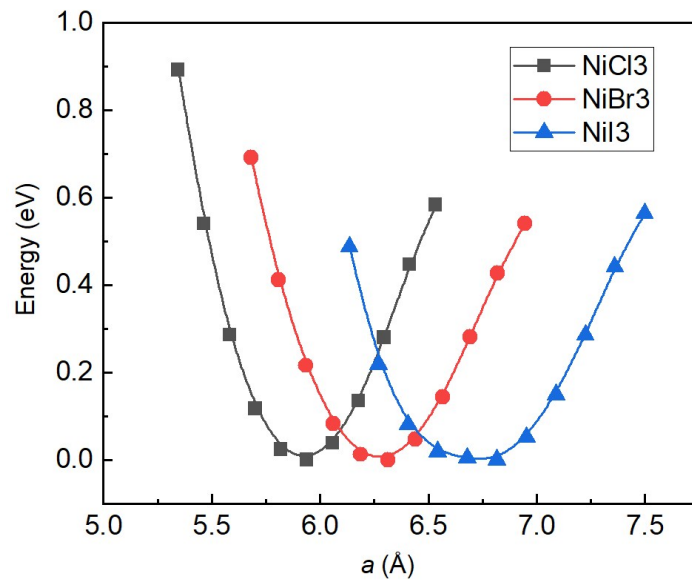

**Fig. S1.** Variation of relative energy with the 2D lattice constant for the monolayer  $\text{NiX}_3$ .

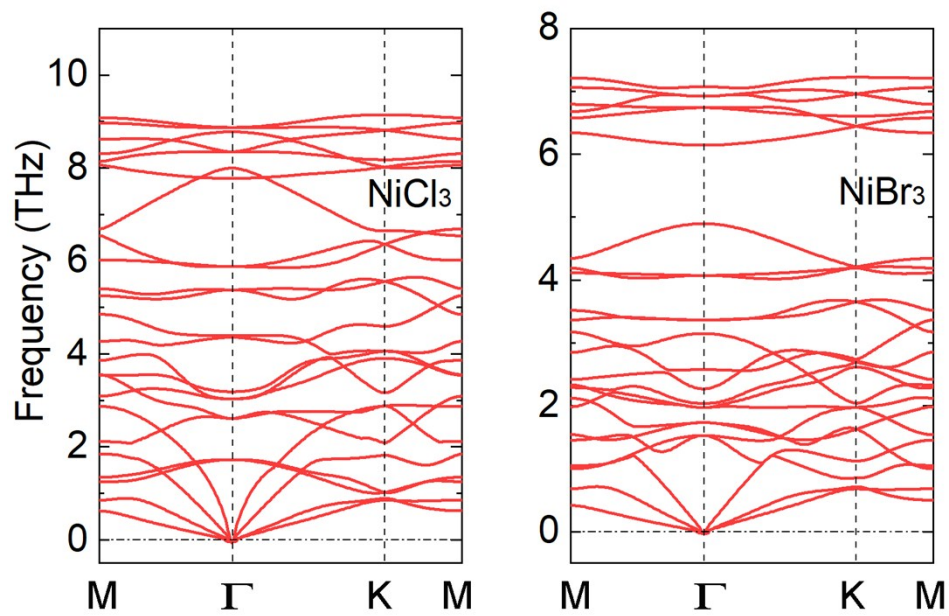

**Fig. S2.** Phonon bands of monolayer NiCl<sub>3</sub> and NiBr<sub>3</sub>.

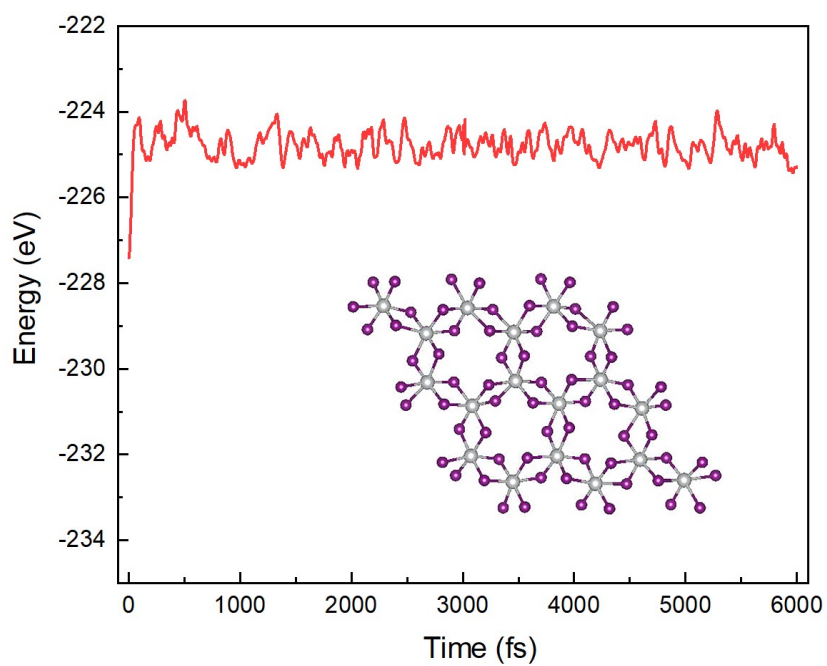

**Fig. S3.** Potential energy fluctuations of NiI<sub>3</sub> as a function of simulation time at 500 K. The inset shows the corresponding structure at 500 K after the simulation for 6 ps.

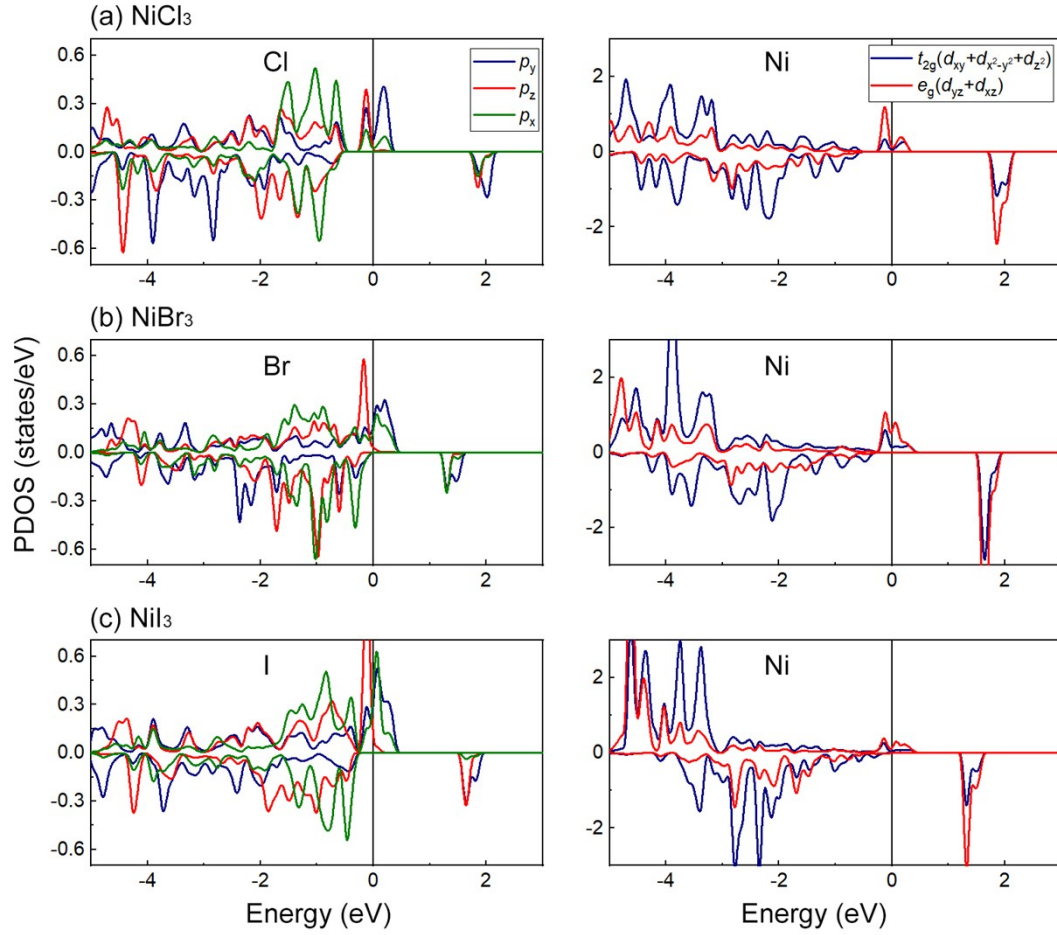

**Fig. S4.** PDOS of  $p$  orbitals for halogen atom and  $d$  orbitals for Ni atom in (a)  $\text{NiCl}_3$ , (b)  $\text{NiBr}_3$ , and (c)  $\text{NiI}_3$  monolayer. The Fermi level is set to zero.

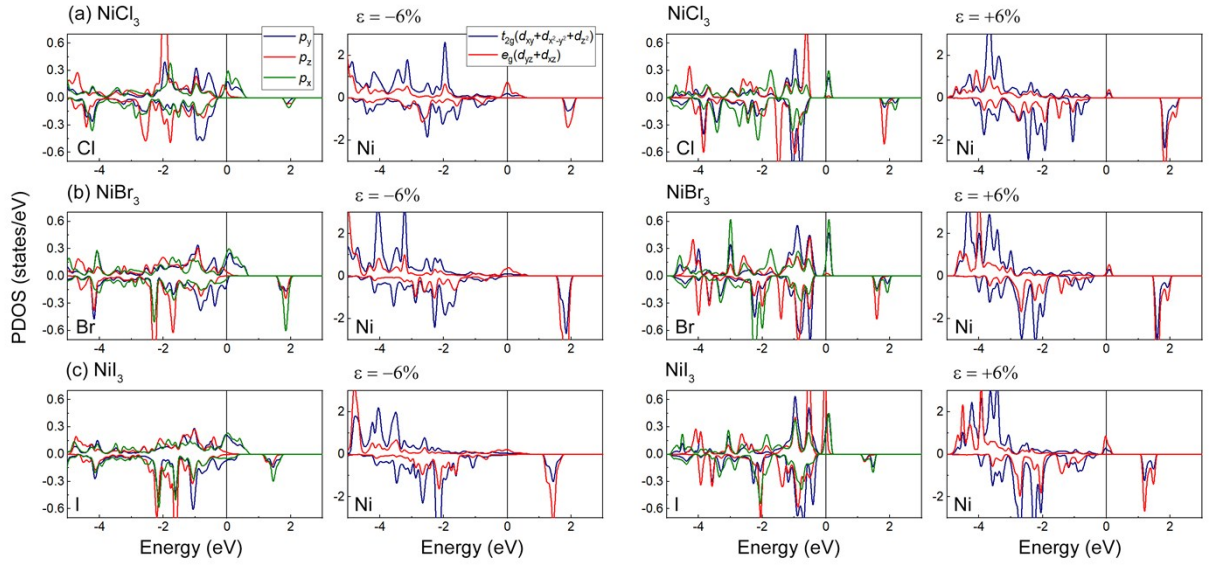

**Fig. S5.** PDOS of  $p$  orbitals for halogen atom and  $d$  orbitals for Ni atom in (a)  $\text{NiCl}_3$ , (b)  $\text{NiBr}_3$ , and (c)  $\text{NiI}_3$  monolayer with the biaxial strain  $\epsilon$  of  $-6\%$  and  $+6\%$ .
